# Supplementary material for: Circulating MicroRNAs in Delayed Cerebral Infarction After Aneurysmal Subarachnoid Hemorrhage
Source: PubMed Central journal article supplement — J Am Heart Assoc. 2017 Apr 25;6(4):e005363. doi: 10.1161/JAHA.116.005363 (PMC5533026; doi:10.1161/jaha.116.005363), 2017-04-25
Supplement: JAH3-6-e005363-s001.pdf [file JAH3-6-e005363-s001.pdf]

# **SUPPLEMENTAL MATERIAL**

**Table S1.** miRNA primer sets for qRT-PCR

| <b>miRNA</b>           | <b>Forward primer sequence (5' to 3')</b> | <b>Reverse primer sequence (5' to 3')</b> |
|------------------------|-------------------------------------------|-------------------------------------------|
| <i>hsa-miR-4433</i>    | GGAGCCAGTTGGACAG                          | GGTCCAGTTTTTTTTTTTTTTATGTC                |
| <i>hsa-miR-93-5p</i>   | GCAAAGTGCTGTTTCGTG                        | GTCCAGTTTTTTTTTTTTTTCTACCT                |
| <i>hsa-miR-339-5p</i>  | CAGTCCCTGTCCTCCAG                         | GGTCCAGTTTTTTTTTTTTTTTCGT                 |
| <i>hsa-miR-3651-5p</i> | CATAGCCCGGTGCGT                           | GGTCCAGTTTTTTTTTTTTTTTCATGT               |
| <i>hsa-miR-27a</i>     | CAGTTCACAGTGGCTAAGTTC                     | CAGTTTTTTTTTTTTTTTGCAGAA                  |
| <i>hsa-miR-27b</i>     | CAGTTCACAGTGGCTAAGTTC                     | TCCAGTTTTTTTTTTTTTTGCAGA                  |
| <i>hsa-miR-15a</i>     | CAGTAGCAGCACATAATGGT                      | GGTCCAGTTTTTTTTTTTTTTTTCAC                |
| <i>hsa-miR-125a</i>    | CCCTGAGACCCTTTAACCT                       | GGTCCAGTTTTTTTTTTTTTTTTCAC                |
| <i>hsa-miR-4454</i>    | GCAGGGATCCGAGTCAC                         | GGTCCAGTTTTTTTTTTTTTTTGGT                 |
| <i>hsa-miR-132-3p</i>  | GCAGTAACAGTCTACAGCCA                      | GTCCAGTTTTTTTTTTTTTTTCGAC                 |
| <i>hsa-miR-4463</i>    | GCAGGAGACTGGGGTG                          | GTTTTTTTTTTTTTTTGGCCCCAC                  |
| <i>hsa-miR-324</i>     | AGAACATTCATTGTTGTCGGT                     | GGTCCAGTTTTTTTTTTTTTTTACAC                |
| <i>hsa-miR-421</i>     | GCAGATCAACAGACATTAATTGG                   | GTTTTTTTTTTTTTTTGCGCCCA                   |
| <i>hsa-mir-4492</i>    | GGGCTGGGCGC                               | GTCCAGTTTTTTTTTTTTTTTGGC                  |
| <i>hsa-miR-4793</i>    | TGCACTGTGAGTTGGCT                         | GGTCCAGTTTTTTTTTTTTTTTAGC                 |
| <i>hsa-miR-4689</i>    | CAGTTGAGGAGACATGGTG                       | GTTTTTTTTTTTTTTTGGCCCCCA                  |
| <i>hsa-miR-4449</i>    | GGGGCTGCGCGA                              | TCCAGTTTTTTTTTTTTTTTGCCT                  |
| <i>hsa-miR-1290</i>    | CGCAGTGGATTTTTGGATCA                      | GTCCAGTTTTTTTTTTTTTTTCCCT                 |
| <i>hsa-miR-4497</i>    | TCCGGGACGGCTG                             | CCAGTTTTTTTTTTTTTTTGCCCA                  |
| <i>hsa-miR-4690-5p</i> | GAGCAGGCGAGGCT                            | GGTCCAGTTTTTTTTTTTTTTTTCAG                |
| <i>hsa-miR-4459</i>    | GGAGGCGGAGGAGGT                           | GGTCCAGTTTTTTTTTTTTTTTCTC                 |
| <i>hsa-miR-4674</i>    | GCTGGGCTCGGGAC                            | CCAGTTTTTTTTTTTTTTTAGCCG                  |
| <i>hsa-miR-1268</i>    | GGGCGTGGTGGTG                             | GGTCCAGTTTTTTTTTTTTTTTTCAC                |
| <i>hsa-miR-3178</i>    | GCGCGGCCGGA                               | GGTCCAGTTTTTTTTTTTTTTTCGAT                |
| <i>hsa-miR-297</i>     | GCAGATGTATGTGTGCATGTG                     | AGGTCCAGTTTTTTTTTTTTTTTCAT                |
| <i>hsa-miR-574</i>     | GTGAGTGTGTGTGTGTGAG                       | CAGGTCCAGTTTTTTTTTTTTTTTACA               |
| <i>hsa-miR-4532</i>    | CCCGGGGAGCCC                              | CAGTTTTTTTTTTTTTTTCGCCG                   |
| <i>hsa-miR-4440</i>    | TCGTGGGGCTTGCT                            | CAGTTTTTTTTTTTTTTTCAAGCCA                 |
| <i>cel-miR-39</i>      | GTCACCGGGTGTAATCAG                        | CCAGTTTTTTTTTTTTTTTCAAGCTG                |

**Table S2.** Gene ontology and KEGG enrichment analyses of the targets of *miR-4532*, *miR-4463*, *miR-1290* and *miR-4793-3p*

| MapID    | MapTitle                                                 | Pvalue      | AdjustedPv  | x | y   | n  | N    | EnrichDirect | GeneIDs                                                                                            |
|----------|----------------------------------------------------------|-------------|-------------|---|-----|----|------|--------------|----------------------------------------------------------------------------------------------------|
| map04310 | Wnt signaling pathway                                    | 0.004095503 | 0.521424353 | 5 | 20  | 61 | 1069 | Over         | ENST00000268459 ENST00000272164 ENST00000374806<br>ENST00000370828 ENST00000374694                 |
| map05217 | Basal cell carcinoma                                     | 0.008067372 | 0.521424353 | 3 | 8   | 61 | 1069 | Over         | ENST00000272164 ENST00000297261 ENST00000374694                                                    |
| map05205 | Proteoglycans in cancer                                  | 0.013642665 | 0.521424353 | 6 | 36  | 61 | 1069 | Over         | ENST00000559488 ENST00000272164 ENST00000297261<br>ENST00000264033 ENST00000355622 ENST00000374694 |
| map04340 | Hedgehog signaling pathway                               | 0.015921354 | 0.521424353 | 3 | 10  | 61 | 1069 | Over         | ENST00000308595 ENST00000297261 ENST00000255641                                                    |
| map04924 | Renin secretion                                          | 0.026893481 | 0.625634513 | 3 | 12  | 61 | 1069 | Over         | ENST00000374806 ENST00000245457 ENST00000368680                                                    |
| map04925 | Aldosterone synthesis and secretion                      | 0.028655016 | 0.625634513 | 2 | 5   | 61 | 1069 | Over         | ENST00000302909 ENST00000368680                                                                    |
| map04724 | Glutamatergic synapse                                    | 0.049227337 | 0.80639532  | 3 | 15  | 61 | 1069 | Over         | ENST00000308595 ENST00000382159 ENST00000374806                                                    |
| map04921 | Oxytocin signaling pathway                               | 0.049245516 | 0.80639532  | 4 | 25  | 61 | 1069 | Over         | ENST00000374806 ENST00000270458 ENST00000263026<br>ENST00000368680                                 |
| map00750 | Vitamin B6 metabolism                                    | 0.057062675 | 0.830578942 | 1 | 1   | 61 | 1069 | Over         | ENST00000225573                                                                                    |
| map04120 | Ubiquitin mediated proteolysis                           | 0.086326741 | 0.898333442 | 4 | 30  | 61 | 1069 | Over         | ENST00000399816 ENST00000492996 ENST00000264033<br>ENST00000291582                                 |
| map04550 | Signaling pathways regulating pluripotency of stem cells | 0.100843751 | 0.898333442 | 3 | 20  | 61 | 1069 | Over         | ENST00000272164 ENST00000231121 ENST00000374694                                                    |
| map04745 | Phototransduction - fly                                  | 0.110919583 | 0.898333442 | 1 | 2   | 61 | 1069 | Over         | ENST00000308595                                                                                    |
| map04122 | Sulfur relay system                                      | 0.110919583 | 0.898333442 | 1 | 2   | 61 | 1069 | Over         | ENST00000452446                                                                                    |
| map04390 | Hippo signaling pathway                                  | 0.113045039 | 0.898333442 | 3 | 21  | 61 | 1069 | Over         | ENST00000272164 ENST00000374694 ENST00000590071                                                    |
| map05412 | Arrhythmogenic right ventricular cardiomyopathy (ARVC)   | 0.146390899 | 0.898333442 | 2 | 12  | 61 | 1069 | Over         | ENST00000559488 ENST00000270458                                                                    |
| map04392 | Hippo signaling pathway - multiple species               | 0.161747985 | 0.898333442 | 1 | 3   | 61 | 1069 | Over         | ENST00000590071                                                                                    |
| map03030 | DNA replication                                          | 0.161747985 | 0.898333442 | 1 | 3   | 61 | 1069 | Over         | ENST00000308418                                                                                    |
| map04916 | Melanogenesis                                            | 0.187886844 | 0.898333442 | 2 | 14  | 61 | 1069 | Over         | ENST00000272164 ENST00000374694                                                                    |
| map05414 | Dilated cardiomyopathy                                   | 0.187886844 | 0.898333442 | 2 | 14  | 61 | 1069 | Over         | ENST00000559488 ENST00000270458                                                                    |
| map01100 | Metabolic pathways                                       | 0.201576085 | 0.898333442 | 6 | 177 | 61 | 1069 | Under        | ENST00000225573 ENST00000216484 ENST00000244043<br>ENST00000339600 ENST00000340941 ENST00000258873 |
| map05410 | Hypertrophic cardiomyopathy (HCM)                        | 0.209219076 | 0.898333442 | 2 | 15  | 61 | 1069 | Over         | ENST00000559488 ENST00000270458                                                                    |
| map00910 | Nitrogen metabolism                                      | 0.209715502 | 0.898333442 | 1 | 4   | 61 | 1069 | Over         | ENST00000454127                                                                                    |
| map00061 | Fatty acid biosynthesis                                  | 0.209715502 | 0.898333442 | 1 | 4   | 61 | 1069 | Over         | ENST00000258873                                                                                    |
| map04976 | Bile secretion                                           | 0.209715502 | 0.898333442 | 1 | 4   | 61 | 1069 | Over         | ENST00000261196                                                                                    |
| map00600 | Sphingolipid metabolism                                  | 0.209715502 | 0.898333442 | 1 | 4   | 61 | 1069 | Over         | ENST00000216484                                                                                    |
| map04146 | Peroxisome                                               | 0.230795625 | 0.898333442 | 2 | 16  | 61 | 1069 | Over         | ENST00000396385 ENST00000295030                                                                    |
| map05032 | Morphine addiction                                       | 0.230795625 | 0.898333442 | 2 | 16  | 61 | 1069 | Over         | ENST00000308595 ENST00000382159                                                                    |
| map04145 | Phagosome                                                | 0.242197418 | 0.898333442 | 3 | 30  | 61 | 1069 | Over         | ENST00000559488 ENST00000350896 ENST00000355622                                                    |

|          |                                           |             |             |   |    |    |      |      |                                                                                                 |
|----------|-------------------------------------------|-------------|-------------|---|----|----|------|------|-------------------------------------------------------------------------------------------------|
| map03022 | Basal transcription factors               | 0.254980623 | 0.898333442 | 1 | 5  | 61 | 1069 | Over | ENST00000607778                                                                                 |
| map05340 | Primary immunodeficiency                  | 0.254980623 | 0.898333442 | 1 | 5  | 61 | 1069 | Over | ENST00000291582                                                                                 |
| map00514 | Other types of O-glycan biosynthesis      | 0.254980623 | 0.898333442 | 1 | 5  | 61 | 1069 | Over | ENST00000389617                                                                                 |
| map03013 | RNA transport                             | 0.274309765 | 0.898333442 | 2 | 18 | 61 | 1069 | Over | ENST00000542526 ENST00000281950                                                                 |
| map04660 | T cell receptor signaling pathway         | 0.274309765 | 0.898333442 | 2 | 18 | 61 | 1069 | Over | ENST00000374806 ENST00000264033                                                                 |
| map04919 | Thyroid hormone signaling pathway         | 0.296085044 | 0.898333442 | 2 | 19 | 61 | 1069 | Over | ENST00000559488 ENST00000396671                                                                 |
| map04978 | Mineral absorption                        | 0.2976932   | 0.898333442 | 1 | 6  | 61 | 1069 | Over | ENST00000233202                                                                                 |
| map03440 | Homologous recombination                  | 0.2976932   | 0.898333442 | 1 | 6  | 61 | 1069 | Over | ENST00000359321                                                                                 |
| map05031 | Amphetamine addiction                     | 0.2976932   | 0.898333442 | 1 | 6  | 61 | 1069 | Over | ENST00000374806                                                                                 |
| map05134 | Legionellosis                             | 0.2976932   | 0.898333442 | 1 | 6  | 61 | 1069 | Over | ENST00000355622                                                                                 |
| map04918 | Thyroid hormone synthesis                 | 0.2976932   | 0.898333442 | 1 | 6  | 61 | 1069 | Over | ENST00000392256                                                                                 |
| map04341 | Hedgehog signaling pathway - fly          | 0.2976932   | 0.898333442 | 1 | 6  | 61 | 1069 | Over | ENST00000255641                                                                                 |
| map04720 | Long-term potentiation                    | 0.2976932   | 0.898333442 | 1 | 6  | 61 | 1069 | Over | ENST00000374806                                                                                 |
| map04130 | SNARE interactions in vesicular transport | 0.2976932   | 0.898333442 | 1 | 6  | 61 | 1069 | Over | ENST00000367568                                                                                 |
| map04020 | Calcium signaling pathway                 | 0.317778521 | 0.898333442 | 2 | 20 | 61 | 1069 | Over | ENST00000282018 ENST00000374806                                                                 |
| map04144 | Endocytosis                               | 0.318859077 | 0.898333442 | 4 | 45 | 61 | 1069 | Over | ENST00000308595 ENST00000264033 ENST00000356956 ENST00000304032                                 |
| map04080 | Neuroactive ligand-receptor interaction   | 0.33714738  | 0.898333442 | 4 | 47 | 61 | 1069 | Over | ENST00000282018 ENST00000590320 ENST00000245457 ENST00000396671                                 |
| map04142 | Lysosome                                  | 0.339329413 | 0.898333442 | 2 | 21 | 61 | 1069 | Over | ENST00000233202 ENST00000356956                                                                 |
| map04071 | Sphingolipid signaling pathway            | 0.360683922 | 0.898333442 | 2 | 22 | 61 | 1069 | Over | ENST00000216484 ENST00000590320                                                                 |
| map03420 | Nucleotide excision repair                | 0.376019682 | 0.898333442 | 1 | 8  | 61 | 1069 | Over | ENST00000607778                                                                                 |
| map03008 | Ribosome biogenesis in eukaryotes         | 0.376019682 | 0.898333442 | 1 | 8  | 61 | 1069 | Over | ENST00000341162                                                                                 |
| map04215 | Apoptosis - multiple species              | 0.376019682 | 0.898333442 | 1 | 8  | 61 | 1069 | Over | ENST00000318407                                                                                 |
| map01212 | Fatty acid metabolism                     | 0.376019682 | 0.898333442 | 1 | 8  | 61 | 1069 | Over | ENST00000258873                                                                                 |
| map05014 | Amyotrophic lateral sclerosis (ALS)       | 0.376019682 | 0.898333442 | 1 | 8  | 61 | 1069 | Over | ENST00000374806                                                                                 |
| map05144 | Malaria                                   | 0.41189414  | 0.898333442 | 1 | 9  | 61 | 1069 | Over | ENST00000355622                                                                                 |
| map00590 | Arachidonic acid metabolism               | 0.41189414  | 0.898333442 | 1 | 9  | 61 | 1069 | Over | ENST00000244043                                                                                 |
| map04662 | B cell receptor signaling pathway         | 0.41189414  | 0.898333442 | 1 | 9  | 61 | 1069 | Over | ENST00000374806                                                                                 |
| map04391 | Hippo signaling pathway - fly             | 0.41189414  | 0.898333442 | 1 | 9  | 61 | 1069 | Over | ENST00000590071                                                                                 |
| map04360 | Axon guidance                             | 0.422132398 | 0.898333442 | 3 | 32 | 61 | 1069 | Over | ENST00000297261 ENST00000374806 ENST00000245323                                                 |
| map05200 | Pathways in cancer                        | 0.442258613 | 0.898333442 | 6 | 78 | 61 | 1069 | Over | ENST00000382159 ENST00000272164 ENST00000297261 ENST00000264033 ENST00000245457 ENST00000374694 |
| map03320 | PPAR signaling pathway                    | 0.445737967 | 0.898333442 | 1 | 10 | 61 | 1069 | Over | ENST00000258873                                                                                 |
| map00071 | Fatty acid metabolism                     | 0.445737967 | 0.898333442 | 1 | 10 | 61 | 1069 | Over | ENST00000258873                                                                                 |
| map04370 | VEGF signaling pathway                    | 0.445737967 | 0.898333442 | 1 | 10 | 61 | 1069 | Over | ENST00000374806                                                                                 |
| map04922 | Glucagon signaling pathway                | 0.445737967 | 0.898333442 | 1 | 10 | 61 | 1069 | Over | ENST00000374806                                                                                 |

|          |                                                  |             |             |   |    |    |      |       |                                                 |
|----------|--------------------------------------------------|-------------|-------------|---|----|----|------|-------|-------------------------------------------------|
| map00280 | Valine, leucine and isoleucine degradation       | 0.445737967 | 0.898333442 | 1 | 10 | 61 | 1069 | Over  | ENST00000340941                                 |
| map04750 | Inflammatory mediator regulation of TRP channels | 0.445737967 | 0.898333442 | 1 | 10 | 61 | 1069 | Over  | ENST00000245457                                 |
| map04114 | Oocyte meiosis                                   | 0.445737967 | 0.898333442 | 1 | 10 | 61 | 1069 | Over  | ENST00000374806                                 |
| map05152 | Tuberculosis                                     | 0.454617174 | 0.902346208 | 3 | 36 | 61 | 1069 | Over  | ENST00000374806 ENST00000355622 ENST00000256458 |
| map04010 | MAPK signaling pathway                           | 0.463909936 | 0.906592628 | 3 | 37 | 61 | 1069 | Over  | ENST00000265080 ENST00000374806 ENST00000270458 |
| map04214 | Apoptosis - fly                                  | 0.477664298 | 0.906592628 | 1 | 11 | 61 | 1069 | Over  | ENST00000318407                                 |
| map05166 | HTLV-I infection                                 | 0.504242149 | 0.906592628 | 3 | 41 | 61 | 1069 | Over  | ENST00000272164 ENST00000374806 ENST00000374694 |
| map04923 | Regulation of lipolysis in adipocytes            | 0.507780062 | 0.906592628 | 1 | 12 | 61 | 1069 | Over  | ENST00000368680                                 |
| map05140 | Leishmaniasis                                    | 0.507780062 | 0.906592628 | 1 | 12 | 61 | 1069 | Over  | ENST00000355622                                 |
| map04920 | Adipocytokine signaling pathway                  | 0.507780062 | 0.906592628 | 1 | 12 | 61 | 1069 | Over  | ENST00000258873                                 |
| map03015 | mRNA surveillance pathway                        | 0.536186321 | 0.906592628 | 1 | 13 | 61 | 1069 | Over  | ENST00000238714                                 |
| map04512 | ECM-receptor interaction                         | 0.536186321 | 0.906592628 | 1 | 13 | 61 | 1069 | Over  | ENST00000559488                                 |
| map04713 | Circadian entrainment                            | 0.562978588 | 0.906592628 | 1 | 14 | 61 | 1069 | Over  | ENST00000382159                                 |
| map05133 | Pertussis                                        | 0.562978588 | 0.906592628 | 1 | 14 | 61 | 1069 | Over  | ENST00000355622                                 |
| map04727 | GABAergic synapse                                | 0.562978588 | 0.906592628 | 1 | 14 | 61 | 1069 | Over  | ENST00000382159                                 |
| map05130 | Pathogenic Escherichia coli infection            | 0.562978588 | 0.906592628 | 1 | 14 | 61 | 1069 | Over  | ENST00000355622                                 |
| map03460 | Fanconi anemia pathway                           | 0.562978588 | 0.906592628 | 1 | 14 | 61 | 1069 | Over  | ENST00000294008                                 |
| map04260 | Cardiac muscle contraction                       | 0.562978588 | 0.906592628 | 1 | 14 | 61 | 1069 | Over  | ENST00000270458                                 |
| map05321 | Inflammatory bowel disease (IBD)                 | 0.562978588 | 0.906592628 | 1 | 14 | 61 | 1069 | Over  | ENST00000355622                                 |
| map04721 | Synaptic vesicle cycle                           | 0.588247125 | 0.906592628 | 1 | 15 | 61 | 1069 | Over  | ENST00000263354                                 |
| map04723 | Retrograde endocannabinoid signaling             | 0.588247125 | 0.906592628 | 1 | 15 | 61 | 1069 | Over  | ENST00000382159                                 |
| map04620 | Toll-like receptor signaling pathway             | 0.588247125 | 0.906592628 | 1 | 15 | 61 | 1069 | Over  | ENST00000355622                                 |
| map04726 | Serotonergic synapse                             | 0.588247125 | 0.906592628 | 1 | 15 | 61 | 1069 | Over  | ENST00000382159                                 |
| map05100 | Bacterial invasion of epithelial cells           | 0.612077225 | 0.921633523 | 1 | 16 | 61 | 1069 | Over  | ENST00000264033                                 |
| map05012 | Parkinson's disease                              | 0.612077225 | 0.921633523 | 1 | 16 | 61 | 1069 | Over  | ENST00000339600                                 |
| map05010 | Alzheimer's disease                              | 0.642889256 | 0.944927224 | 2 | 24 | 61 | 1069 | Over  | ENST00000374806 ENST00000339600                 |
| map04910 | Insulin signaling pathway                        | 0.656299976 | 0.944927224 | 2 | 26 | 61 | 1069 | Over  | ENST00000452015 ENST00000264033                 |
| map04022 | cGMP-PKG signaling pathway                       | 0.656299976 | 0.944927224 | 2 | 26 | 61 | 1069 | Over  | ENST00000374806 ENST00000368680                 |
| map04150 | mTOR signaling pathway                           | 0.663613012 | 0.944927224 | 2 | 27 | 61 | 1069 | Over  | ENST00000272164 ENST00000374694                 |
| map04380 | Osteoclast differentiation                       | 0.663613012 | 0.944927224 | 2 | 27 | 61 | 1069 | Over  | ENST00000559488 ENST00000374806                 |
| map04024 | cAMP signaling pathway                           | 0.687211007 | 0.96785942  | 2 | 30 | 61 | 1069 | Over  | ENST00000245457 ENST00000368680                 |
| map04062 | Chemokine signaling pathway                      | 0.695449691 | 0.96785942  | 2 | 31 | 61 | 1069 | Over  | ENST00000308595 ENST00000382159                 |
| map05034 | Alcoholism                                       | 0.716617786 | 0.96785942  | 1 | 35 | 61 | 1069 | Under | ENST00000382159                                 |
| map04015 | Rap1 signaling pathway                           | 0.716617786 | 0.96785942  | 1 | 35 | 61 | 1069 | Under | ENST00000559488                                 |

|          |                                              |             |            |   |    |    |      |       |                                                 |
|----------|----------------------------------------------|-------------|------------|---|----|----|------|-------|-------------------------------------------------|
| map04510 | Focal adhesion                               | 0.716659265 | 0.96785942 | 1 | 34 | 61 | 1069 | Under | ENST00000559488                                 |
| map04151 | PI3K-Akt signaling pathway                   | 1           | 1          | 3 | 60 | 61 | 1069 | Under | ENST00000559488 ENST00000382159 ENST00000355622 |
| map04066 | HIF-1 signaling pathway                      | 1           | 1          | 1 | 17 | 61 | 1069 | Over  | ENST00000355622                                 |
| map04064 | NF-kappa B signaling pathway                 | 1           | 1          | 1 | 17 | 61 | 1069 | Over  | ENST00000355622                                 |
| map05132 | Salmonella infection                         | 1           | 1          | 1 | 17 | 61 | 1069 | Over  | ENST00000355622                                 |
| map00230 | Purine metabolism                            | 1           | 1          | 1 | 20 | 61 | 1069 | Under | ENST00000368680                                 |
| map04725 | Cholinergic synapse                          | 1           | 1          | 1 | 18 | 61 | 1069 | Under | ENST00000382159                                 |
| map04611 | Platelet activation                          | 1           | 1          | 1 | 23 | 61 | 1069 | Under | ENST00000559488                                 |
| map05142 | Chagas disease (American trypanosomiasis)    | 1           | 1          | 1 | 20 | 61 | 1069 | Under | ENST00000355622                                 |
| map04270 | Vascular smooth muscle contraction           | 1           | 1          | 1 | 18 | 61 | 1069 | Under | ENST00000368680                                 |
| map05145 | Toxoplasmosis                                | 1           | 1          | 1 | 31 | 61 | 1069 | Under | ENST00000355622                                 |
| map04014 | Ras signaling pathway                        | 1           | 1          | 2 | 42 | 61 | 1069 | Under | ENST00000265080 ENST00000382159                 |
| map04931 | Insulin resistance                           | 1           | 1          | 1 | 18 | 61 | 1069 | Under | ENST00000452015                                 |
| map05206 | MicroRNAs in cancer                          | 1           | 1          | 1 | 23 | 61 | 1069 | Under | ENST00000559488                                 |
| map04932 | Non-alcoholic fatty liver disease (NAFLD)    | 1           | 1          | 1 | 26 | 61 | 1069 | Under | ENST00000339600                                 |
| map05016 | Huntington's disease                         | 1           | 1          | 1 | 29 | 61 | 1069 | Under | ENST00000339600                                 |
| map04722 | Neurotrophin signaling pathway               | 1           | 1          | 1 | 20 | 61 | 1069 | Under | ENST00000256458                                 |
| map04640 | Hematopoietic cell lineage                   | 1           | 1          | 1 | 18 | 61 | 1069 | Under | ENST00000559488                                 |
| map05162 | Measles                                      | 1           | 1          | 1 | 18 | 61 | 1069 | Under | ENST00000355622                                 |
| map05323 | Rheumatoid arthritis                         | 1           | 1          | 1 | 25 | 61 | 1069 | Under | ENST00000355622                                 |
| map04530 | Tight junction                               | 1           | 1          | 1 | 31 | 61 | 1069 | Under | ENST00000216181                                 |
| map04740 | Olfactory transduction                       | 1           | 1          | 3 | 55 | 61 | 1069 | Under | ENST00000308595 ENST00000382159 ENST00000315453 |
| map04650 | Natural killer cell mediated cytotoxicity    | 1           | 1          | 1 | 20 | 61 | 1069 | Under | ENST00000374806                                 |
| map04012 | ErbB signaling pathway                       | 1           | 1          | 1 | 20 | 61 | 1069 | Under | ENST00000264033                                 |
| map05164 | Influenza A                                  | 1           | 1          | 1 | 26 | 61 | 1069 | Under | ENST00000355622                                 |
| map05161 | Hepatitis B                                  | 1           | 1          | 1 | 21 | 61 | 1069 | Under | ENST00000355622                                 |
| map05146 | Amoebiasis                                   | 1           | 1          | 1 | 18 | 61 | 1069 | Under | ENST00000355622                                 |
| map05202 | Transcriptional misregulation in cancer      | 1           | 1          | 1 | 23 | 61 | 1069 | Under | ENST00000296921                                 |
| map04810 | Regulation of actin cytoskeleton             | 1           | 1          | 2 | 41 | 61 | 1069 | Under | ENST00000559488 ENST00000382108                 |
| map01120 | Microbial metabolism in diverse environments | 1           | 1          | 1 | 26 | 61 | 1069 | Under | ENST00000225573                                 |
| map04152 | AMPK signaling pathway                       | 1           | 1          | 1 | 20 | 61 | 1069 | Under | ENST00000263026                                 |
| map04261 | Adrenergic signaling in cardiomyocytes       | 1           | 1          | 1 | 23 | 61 | 1069 | Under | ENST00000270458                                 |
| map00190 | Oxidative phosphorylation                    | 1           | 1          | 1 | 22 | 61 | 1069 | Under | ENST00000339600                                 |
| map05220 | Chronic myeloid leukemia                     | 1           | 1          | 1 | 19 | 61 | 1069 | Under | ENST00000264033                                 |
| map04728 | Dopaminergic synapse                         | 1           | 1          | 1 | 19 | 61 | 1069 | Under | ENST00000382159                                 |
